# Supplementary material
Source: publisher site journal article supplement (https://www.dovepress.com/article/554788)
Supplement: Supplementary file 1 [file 554788%20Revised%20Supplementary%20materials.docx]

**Supplementary materials**

**Supplementary Table S1. Heterogeneity of SNPs of PDCD1**

| outcome | exposure | method | Q | *p*-value |
| --- | --- | --- | --- | --- |
| HCC | PDCD1 | MR Egger | 6.618 | 0.251 |
| HCC | PDCD1 | Inverse variance weighted | 6.896 | 0.331 |

Abbreviations: SNP, single nucleotide polymorphism; HCC, hepatocellular carcinoma; PDCD1, programmed cell death protein 1; MR, mendelian randomization.

**Supplementary Table S2. Pleiotropy of SNPs of PDCD1**

| outcome | exposure | MR-Egger intercept | *p*-value |
| --- | --- | --- | --- |
| HCC | PDCD1 | 0.024 | 0.666 |

Abbreviations: SNP, single nucleotide polymorphism; HCC, hepatocellular carcinoma; PDCD1, programmed cell death protein 1.


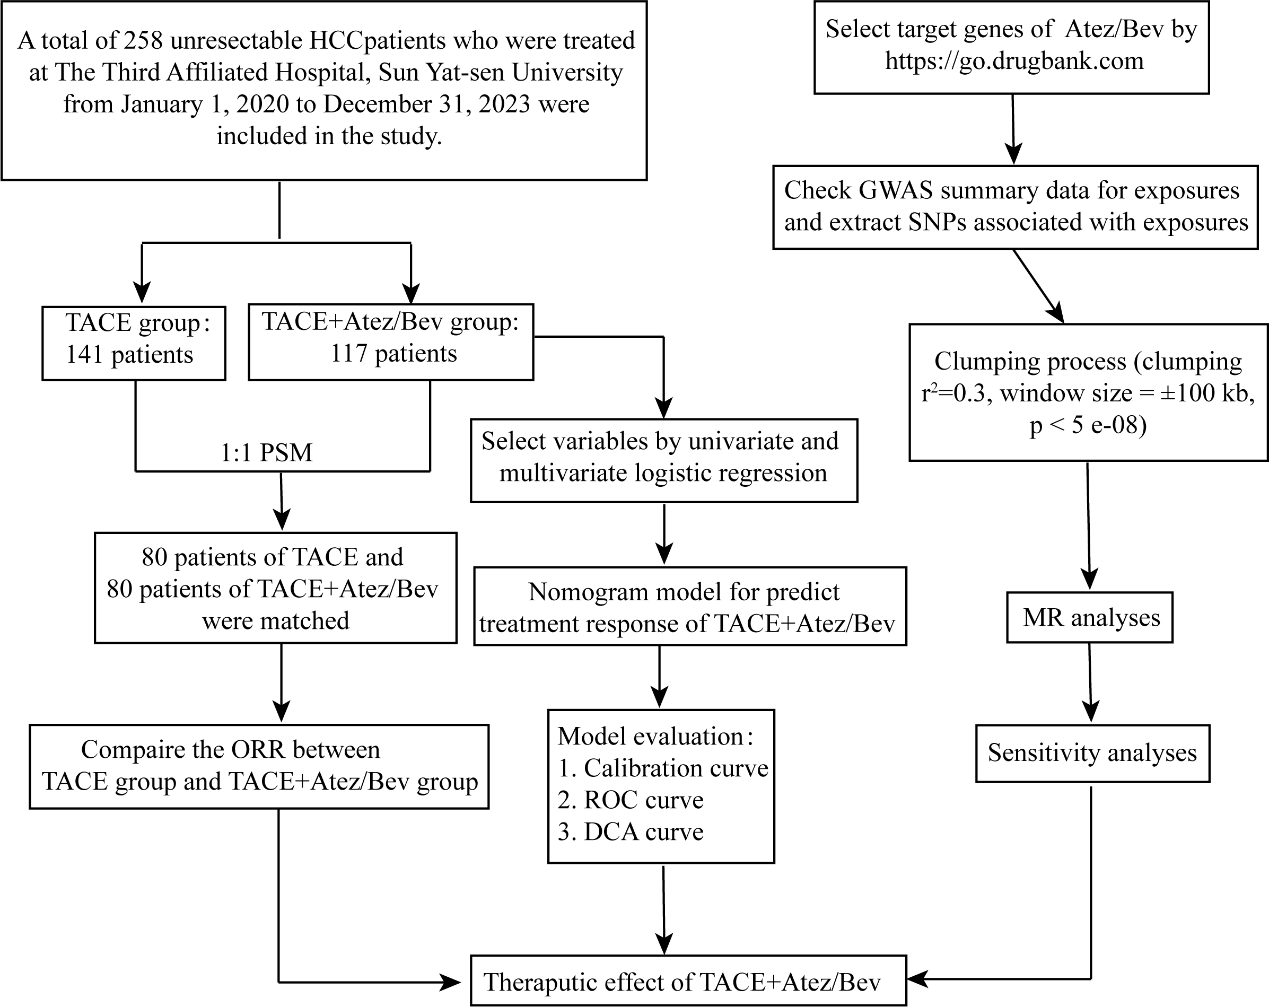


**Supplementary Figure S1. Flowchart of the study.** Abbreviations: HCC, hepatocellular carcinoma; TACE, transcatheter arterial chemoembolization; Atez/Bev, atezolizumab plus bevacizumab; PSM, propensity score matching; ORR, objective response rate; ROC, receiver operating characteristic; DCA, decision curve analysis; GWAS, genome-wide association study; SNP, single nucleotide polymorphism; MR, mendelian randomization.


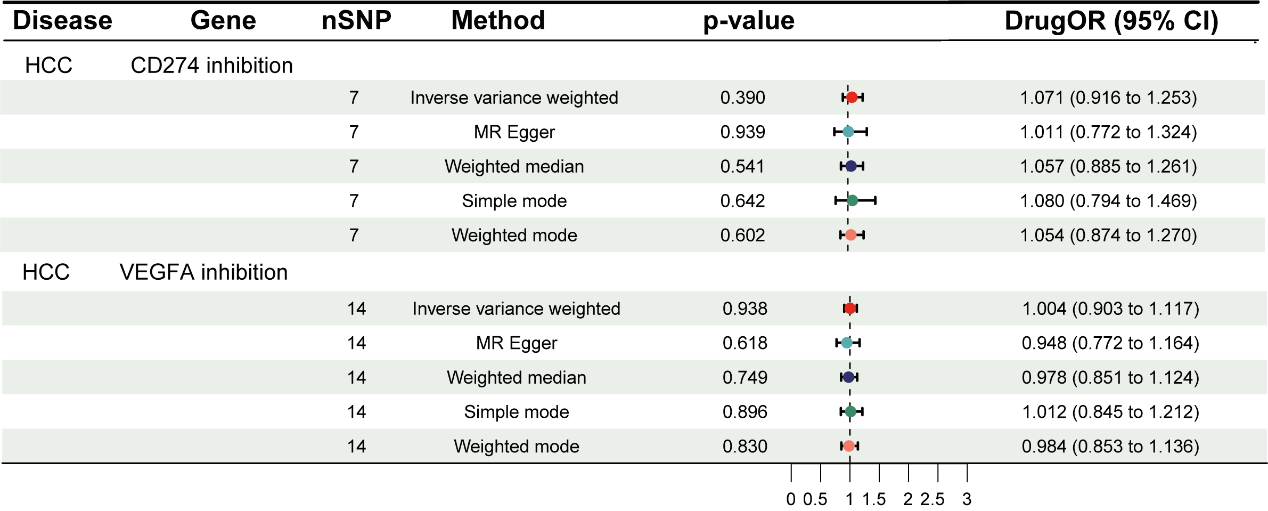


**Supplementary Figure S2.** **Causality analysis of *CD274* and *VEGFA* in HCC.** Abbreviations: HCC, hepatocellular carcinoma; SNP, single nucleotide polymorphism; CD274, cluster of differentiation 274; VEGFA, vascular endothelial growth factor A; OR, odds ratio; MR, mendelian randomization; CI, confidence interval.
